# Supplementary material for: Protein and DNA methylation-based scores as surrogate markers for interferon system activation in patients with primary Sjögren’s syndrome
Source: PubMed Central journal article supplement — RMD Open. 2020 Jan 7;6(1):e000995. doi: 10.1136/rmdopen-2019-000995 (PMC7046975; doi:10.1136/rmdopen-2019-000995), 2020-01-07
Supplement: rmdopen-2019-000995supp003.pdf [file rmdopen-2019-000995supp003.pdf]

**Supplementary Table 2.** Top proteins correlating with qPCR IFN scores in B cells.

|         | <b>Spearman r<sup>a</sup></b> | <b>P value</b> |
|---------|-------------------------------|----------------|
| PD-1    | 0.70                          | <0.0001        |
| CXCL10  | 0.68                          | <0.0001        |
| CXCL9   | 0.67                          | <0.0001        |
| CD27    | 0.64                          | <0.0001        |
| CXCL11  | 0.61                          | <0.0001        |
| Gal-9   | 0.60                          | <0.0001        |
| GZMA    | 0.60                          | <0.0001        |
| TNFRSF4 | 0.60                          | <0.0001        |
| TNFRSF9 | 0.59                          | <0.0001        |
| LAMP-3  | 0.55                          | 0.0003         |
| CXCL13  | 0.53                          | 0.0005         |
| IL-12   | 0.52                          | 0.0006         |
| CD83    | 0.51                          | 0.0009         |

<sup>a</sup> cut-off for protein list at Spearman  $r > 0.5$
